# Supplementary material for: Genetic characterisation and phylogenetic status of whipworms (Trichuris spp.) from captive non-human primates in China, determined by nuclear and mitochondrial sequencing
Source: PubMed Central journal article supplement (PMC6149069; doi:10.1186/s13071-018-3100-5), 2018-09-20
Supplement: 13071_2018_3100_MOESM1_ESM.pdf [file 13071_2018_3100_MOESM1_ESM.pdf]

Tsp\_Ph (DK) AATCACAAAGGATTTGGTACGATGTACATACTATTTGGAGTCTGAAGAGGTATAATAGGTCGTGCCCTTTCAATAATTATTTCGATTTACCTTGATATCGCCATGAAGCTTTGAA  
Tsp\_Ph (CN) ..... G ..... G A  
Tsp\_Nl ..... G ..... G A  
Tsp\_Pa .....  
Tsp\_Ml .....  
Tsp\_Mm .....  
Tsp\_Ca .....  
Tsp\_Rr ..... C ..... A A ..... A T A T T ..... T A T G T ..... C C A T G ..... T ..... A T C T G T ..... A C  
Tsp\_Rb ..... C ..... A A ..... A T A T T ..... T A T G T ..... C C A T G ..... T ..... C A T C T G T ..... A C  
Ttr ..... T ..... A ..... T ..... C ..... C T C ..... G ..... T ..... T ..... G .....  
Tsu ..... T A A ..... C T A ..... T ..... C T ..... A T C T T A ..... G ..... T A ..... T A C T T G ..... A T  
Tmu ..... T A A ..... C T A T ..... T ..... T T ..... A C ..... C T T A ..... C A ..... T A C T C C ..... A C  
Tdi ..... A A ..... C C A ..... T C C A ..... G C A T T A T ..... C ..... A T G C T T T T ..... T  
Tov ..... A A ..... C A ..... T T A ..... C ..... A T A T G T ..... C T A T A C T T T T ..... G T

Tsp\_Ph (DK) ACGTCTCTTCTGAGGGAATATTATAATACAGTAGTCTCTGCTCACGCAGTAGCTATAATTTTCTTTATAGTTATACCTATTTTATAGGAGGATTGGAAACTGATTGTTACCT  
Tsp\_Ph (CN) ..... A ..... C ..... C ..... G ..... C .....  
Tsp\_Nl ..... C .....  
Tsp\_Pa .....  
Tsp\_Ml ..... C .....  
Tsp\_Mm ..... C .....  
Tsp\_Ca ..... C .....  
Tsp\_Rr ..... C ..... A ..... G T ..... T ..... A T T A T ..... G T ..... A ..... C C ..... C G ..... T T ..... C G .....  
Tsp\_Rb ..... C ..... A ..... G T ..... T ..... A T T A T ..... T T ..... A ..... C C ..... C G ..... T T ..... C G .....  
Ttr ..... A ..... G A A G C C C ..... T ..... T ..... T ..... G A ..... A ..... C ..... C ..... A C .....  
Tsu ..... A C A T A ..... A ..... T A C A ..... T G ..... G C ..... C T T A ..... G  
Tmu ..... A C A T A ..... G A ..... T A C A ..... G C ..... C T C A ..... A  
Tdi ..... T A C A ..... C T G A ..... G T T A ..... T ..... T ..... G T C A C A ..... A  
Tov ..... T T A C G ..... C C C T ..... A T T T ..... T ..... C C ..... T ..... G C A C C A

Tsp\_Ph (DK) TTAATAGTAGGGGCTCAAGATATATCCTTTCTCGTCTAAATAATCTAGGGTTTTGACTTCTCCGCTGTACTACTTTTGGTTATAAGGTCATATTTATTGGCTCAGGGCA  
Tsp\_Ph (CN) ..... C ..... T ..... A .....  
Tsp\_Nl ..... C ..... T ..... A .....  
Tsp\_Pa .....  
Tsp\_Ml .....  
Tsp\_Mm .....  
Tsp\_Ca .....  
Tsp\_Rr ..... A T ..... A C ..... G T C A A T ..... T C ..... C T A T C ..... A ..... C T T C G C A ..... A A ..... T  
Tsp\_Rb ..... A T ..... A C ..... G T C A A T ..... T C ..... C T A T C ..... A ..... C T T C G C A ..... A A ..... T  
Ttr ..... A ..... G ..... G T C C T ..... C T A ..... C ..... C ..... A ..... G ..... T ..... T .....  
Tsu ..... C ..... A ..... C G A ..... A C ..... T A C A A G T A C A C C G A ..... G C ..... A A A G A .....  
Tmu ..... C ..... A ..... G A ..... C G A ..... A C ..... T A T A A T A C A C C ..... G C ..... A A A G A .....  
Tdi ..... A T G T C C ..... T ..... A T ..... C ..... G T G ..... A A G T A A T T C ..... C C A T A T T T .....  
Tov ..... A C ..... T C ..... C G T ..... G G ..... T T A ..... T G A T G ..... G C A C T C G ..... C C A G A ..... T T

Tsp\_Ph (DK) GGAACAGGATGAACCTTTATCCGCCCTATCCTCATGATTTGGTACCCTAAATCATAGAGTAGATCTCATAATCTTTGCTTACACCTGGCCGGAATTTCTTACTGGCAGGC  
Tsp\_Ph (CN) ..... G ..... G .....  
Tsp\_Nl ..... G .....  
Tsp\_Pa ..... A .....  
Tsp\_Ml ..... A ..... A .....  
Tsp\_Mm ..... A ..... A .....  
Tsp\_Ca ..... A .....  
Tsp\_Rr ..... G T ..... A ..... T T T A ..... T ..... C ..... G G ..... T G ..... T A T T ..... T T ..... T  
Tsp\_Rb ..... G T ..... A ..... T T T A ..... T ..... C ..... G G ..... T G ..... T A T T ..... T T ..... T  
Ttr ..... C ..... C C T ..... G T ..... T G ..... G T G ..... T ..... T ..... A G T C C ..... T .....  
Tsu ..... G ..... C ..... T A C C T ..... T C C ..... C ..... C T T G T ..... T A A ..... A C T A .....  
Tmu ..... T ..... C ..... T A C C T T ..... T G C ..... C T C C ..... C T T G T ..... T A A ..... A T T G A .....  
Tdi ..... C T T G C C ..... T T T G C ..... C C T ..... G ..... T T T A ..... A C ..... A T A T A .....  
Tov ..... T T T ..... T A ..... T T G T ..... C C T ..... C C ..... T G T ..... A ..... T T A T G ..... A T A T T A

Tsp\_Ph (DK) AGAATCAACTTCATCTCCACATGTTTCATAGGAAAACCATCATATTCACCCCTTGACCGATTCTCAATATTTACTTGAAGCATTATTACTTCTTTTATATTAATCATTTC  
Tsp\_Ph (CN) ..... T .....  
Tsp\_Nl ..... T .....  
Tsp\_Pa .....  
Tsp\_Ml .....  
Tsp\_Mm .....  
Tsp\_Ca .....  
Tsp\_Rr ..... T ..... T A ..... C T A ..... A T ..... T T A T ..... T T ..... T G A ..... C ..... C C G C ..... T T .....  
Tsp\_Rb ..... T ..... T A ..... C T A ..... A T ..... T T A T ..... T T ..... T G A ..... C ..... C C G C ..... T T .....  
Ttr ..... T T T ..... T ..... G T ..... T T C ..... G ..... C ..... C ..... G C ..... T T .....  
Tsu ..... T T T T G T ..... T T T G G T T G C T T C T C T T ..... G T G A G ..... C A G A C T T .....  
Tmu ..... T T T T G T G ..... T T T G T G C T T C T T ..... C A T G A ..... C A A G C T T .....  
Tdi ..... T T T T T T ..... T T G A G T T T G ..... A C T G C G A T G A G ..... A T C T G C G .....  
Tov ..... T T T ..... T T C T C G T ..... G A T G T T T ..... A T C T C T ..... C G A ..... A G G G ..... C C ..... C G C T T G C A T

Tsp\_Ph (DK) TTACCAGTTTTGGCTGGGGCATTACCATACTCCTAACAGATCGTAATTTCCGGATCAACATTCTTTGAAGTATCTGGAGGCGGGGACCCCTATCTTATTCCAACATATTTTTGA  
Tsp\_Ph (CN) ..... T ..... G .....  
Tsp\_Nl ..... T ..... G .....  
Tsp\_Pa .....  
Tsp\_Ml ..... A .....  
Tsp\_Mm ..... A .....  
Tsp\_Ca ..... A ..... C .....  
Tsp\_Rr ..... A ..... A C T ..... T ..... C C T ..... T ..... T C ..... C T ..... C G .....  
Tsp\_Rb ..... A ..... A C T ..... T ..... C C T ..... T ..... T C T C T ..... C G .....  
Ttr ..... C A C A T C ..... C C ..... C T C G ..... A ..... A T ..... T C T G ..... C .....  
Tsu ..... G A A C ..... A G A T ..... T C T T T C ..... T C A T ..... A T T ..... T G T ..... C G .....  
Tmu ..... G ..... G A ..... A T ..... A A ..... T C T T T ..... T ..... A T ..... C G T ..... C G .....  
Tdi ..... C C T A C T ..... C A C ..... T A T ..... T C A ..... T G T ..... C ..... C T G T ..... T T .....  
Tov ..... C C T A C A A A A C T G T T ..... G C ..... C C ..... C T A T T ..... T G

Tsp\_Ph (DK) TTTTTCGGGCACCCGAAGTTTACATTTTAGTGCTCCAGCATTTGGGGCAATCTCTGAGTCCATTATGTATATAGCAGGAAA  
Tsp\_Ph (CN) .....  
Tsp\_Nl .....  
Tsp\_Pa .....  
Tsp\_Ml .....  
Tsp\_Mm .....  
Tsp\_Ca .....  
Tsp\_Rr ..... T C T T ..... C ..... G T A T ..... T ..... A T A T .....  
Tsp\_Rb ..... T C T T ..... C ..... G T A T ..... T ..... A T A T .....  
Ttr ..... T C ..... A T ..... A T G ..... T C ..... T C A T C .....  
Tsu ..... T T T A T ..... A T G T ..... C C ..... T C A T G T .....  
Tmu ..... T T T A T ..... A G T ..... T ..... T G A T C G T .....  
Tdi ..... T T T T G T C ..... C T A T G C C ..... T C ..... A T A C .....  
Tov ..... T A T ..... A T C ..... A T G C ..... C ..... T A A A C C C
